# Supplementary material
Source: PubMed Central journal article supplement (PMC6234359)

## **Supplementary Materials and Methods**

### *Phosphorylation studies*

Phosphorylation of Syk (15min treatment), SHP1, SHP2, SHIP1 or SHIP2 (1, 5 or 30min treatment) in the treated macrophages were measured using the MSD platform (Meso Scale Diagnostics), following the Manufacturer`s instructions.

### *Flow cytometry*

The immuno-phenotyping of macrophages was monitored by flow cytometer using fluorochrome-conjugated mouse anti-human antibodies (BD Pharmingen): CD16-BV421, CD32-FITC, CD64-BUV737, CD40-APC, CD80-AF700, HO-1-AF647, CD206-BV510 and NRP1-BV421. Fluorescence intensities were measured and analyzed by LSRII flow cytometer (BD Biosciences Immunocytometry Systems). Data analysis was performed using FlowJo software v10 (Tree Star).

### *Enzyme-linked immunosorbent assay*

The production of pro-inflammatory cytokines was measured from supernatants of treated macrophages using the MSD 10-cytokine Pro-Inflammatory Panel (Meso Scale Diagnostics), following the Manufacturer`s instruction.

### *Antioxidant capacity*

Human blood plasma samples from healthy individuals (in-house blood donor program) or inhibitor-negative and inhibitor-positive Hema patients (HRF, Inc.; George King Bio-Medical, Inc.) were tested using the Total Antioxidant Capacity Assay Kit (Abcam), following the Manufacturer`s instruction.

## Supplementary Figure legends

**Supplementary Figure 1. Dose correlation of HO-1 protein expression, *PPAR* $\gamma$  gene expression and reduced glutathione production in macrophages.** Macrophages (n=3) were treated with IgG1, rFVIII or rFVIII-Fc at the indicated concentrations. **(A)** HO-1 protein expression was measured by flow cytometry after 24h treatment. **(B)** *PPAR* $\gamma$  mRNA expression was measured after 6h of treatment by Q-PCR. **(C)** Glutathione production was measured from lysates of cells treated for 24h. Mean $\pm$ SE; \*p $\leq$ 0.05, \*\*p $\leq$  0.01, \*\*\*p $\leq$  0.005, calculated as compared to untreated cells.

**Supplementary Figure 2. RNA sequencing pipeline.** Bioinformatics analyses: the reads were aligned with STAR (version 2.4.0c) <sup>58</sup>, and genes annotated in Gencode v18 were quantified with featureCounts (v1.4.3-p1) <sup>59</sup>. Normalization and differential expression was done with the Bioconductor package DESeq2 <sup>60</sup>. p $\leq$ 0.05 was taken as significant difference.

**Supplementary Figure 3. Metabolite screening summary of lysates of IgG1-, rFVIII- or rFVIII-Fc-treated macrophages.** Green: indicates significant difference – downregulation (p $\leq$ 0.05); red: indicates significant difference – upregulation (p $\leq$ 0.05); light green: narrowly missed cutoff for significance - downregulation; 0.05<p<0.10; light red: narrowly missed cutoff for significance - upregulation; 0.05<p<0.10; Non-colored text and cell: mean values are not significantly different for that comparison.

**Supplementary Figure 4. Fatty acid screening of IgG1-, rFVIII- or rFVIII-Fc-treated macrophage lysates.** Green: indicates significant difference – downregulation ( $p \leq 0.05$ ); red: indicates significant difference – upregulation ( $p \leq 0.05$ ); light green: narrowly missed cutoff for significance - downregulation;  $0.05 < p < 0.10$ ; light red: narrowly missed cutoff for significance - upregulation;  $0.05 < p < 0.10$ ; Non-colored text and cell: mean values are not significantly different for that comparison.

**Supplementary Figure 5. Mouse bone marrow-derived macrophages respond to rFVIII-Fc treatment with polarization to Mox/M2-like cells.** Bone marrow from 12-week-old C57BL/6 mice was collected and cultured in complete RPMI medium supplemented with 20ng/ml rmM-CSF for 6 days. Mouse macrophages ( $n=5$ ) then were treated with 200nM each of IgG1, rFVIII or rFVIII-Fc. (A) HO-1 protein expression was measured by flow cytometry from 24h-treated samples. (B) Arginase 1 (*Arg1*) mRNA expression was measured after 6h of treatment by Q-PCR. (C) Glutathione production was measured from lysates of cells treated for 24h. Mean $\pm$ SE; \* $p \leq 0.05$ , \*\* $p \leq 0.01$ , \*\*\* $p \leq 0.005$ .

**A**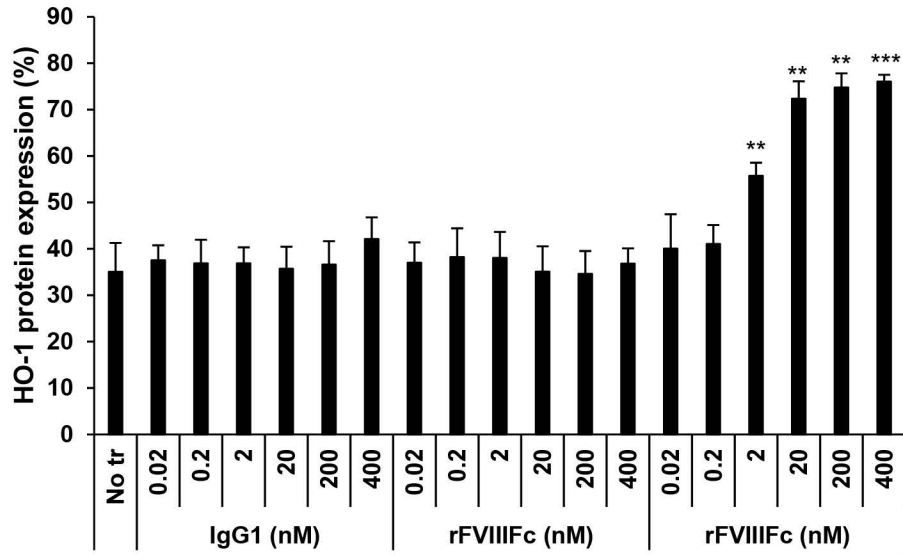**B**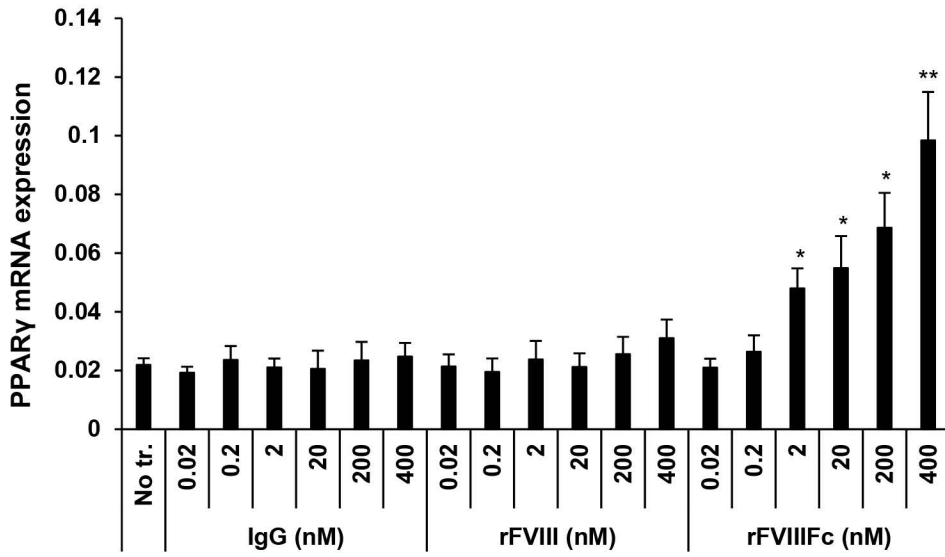**C**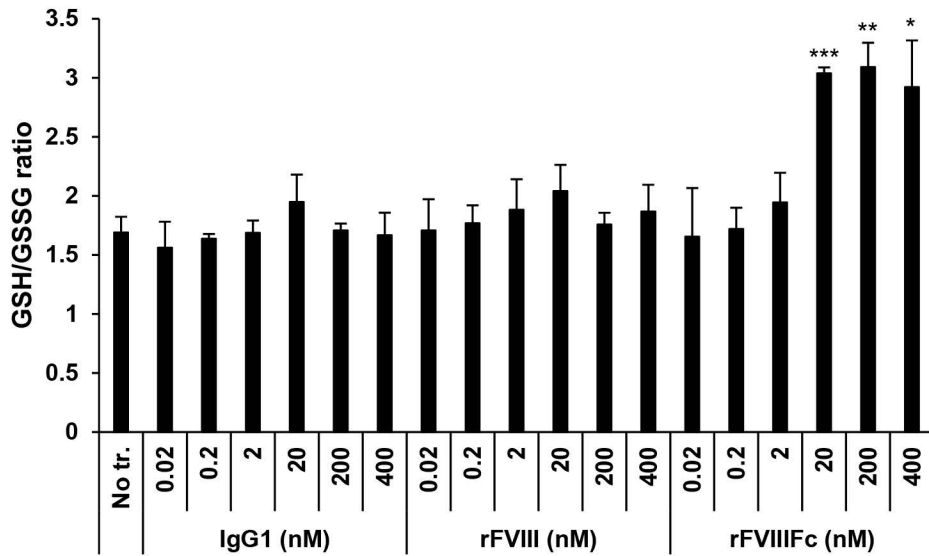

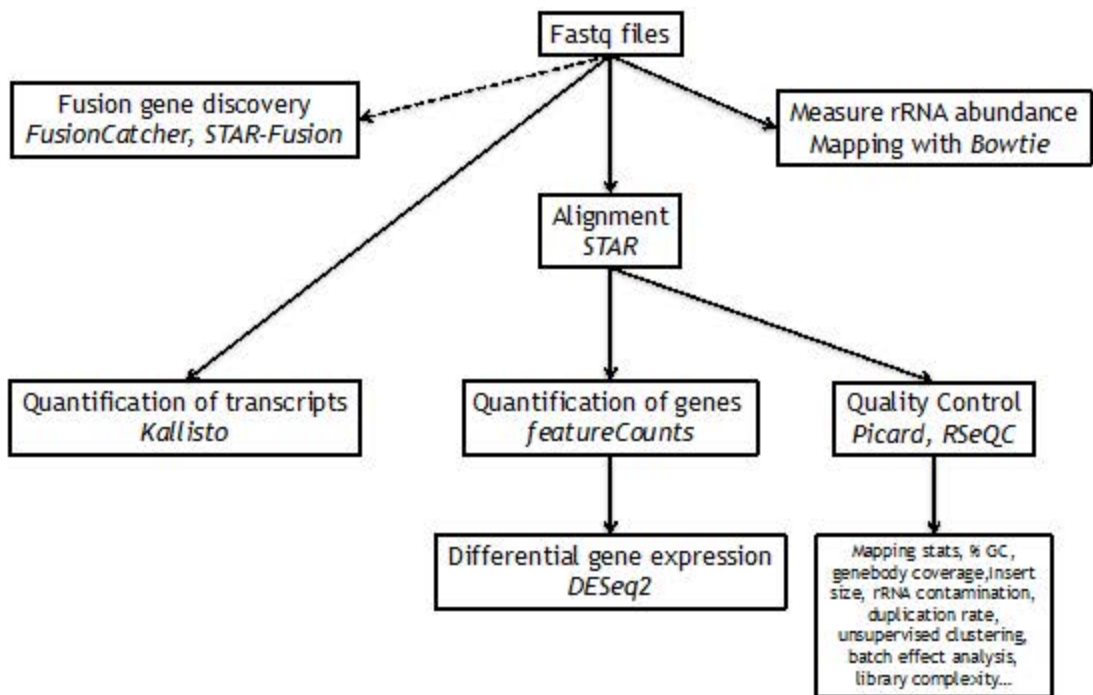

| Super Pathway          |                                                                                   |
|------------------------|-----------------------------------------------------------------------------------|
| Amino Acid             |  |
| Peptide                |  |
| Carbohydrate           |  |
| Energy                 |  |
| Lipid                  |  |
| Nucleotide             |  |
| Cofactors and Vitamins |  |
| Xenobiotics            |  |
| Unnamed                |  |

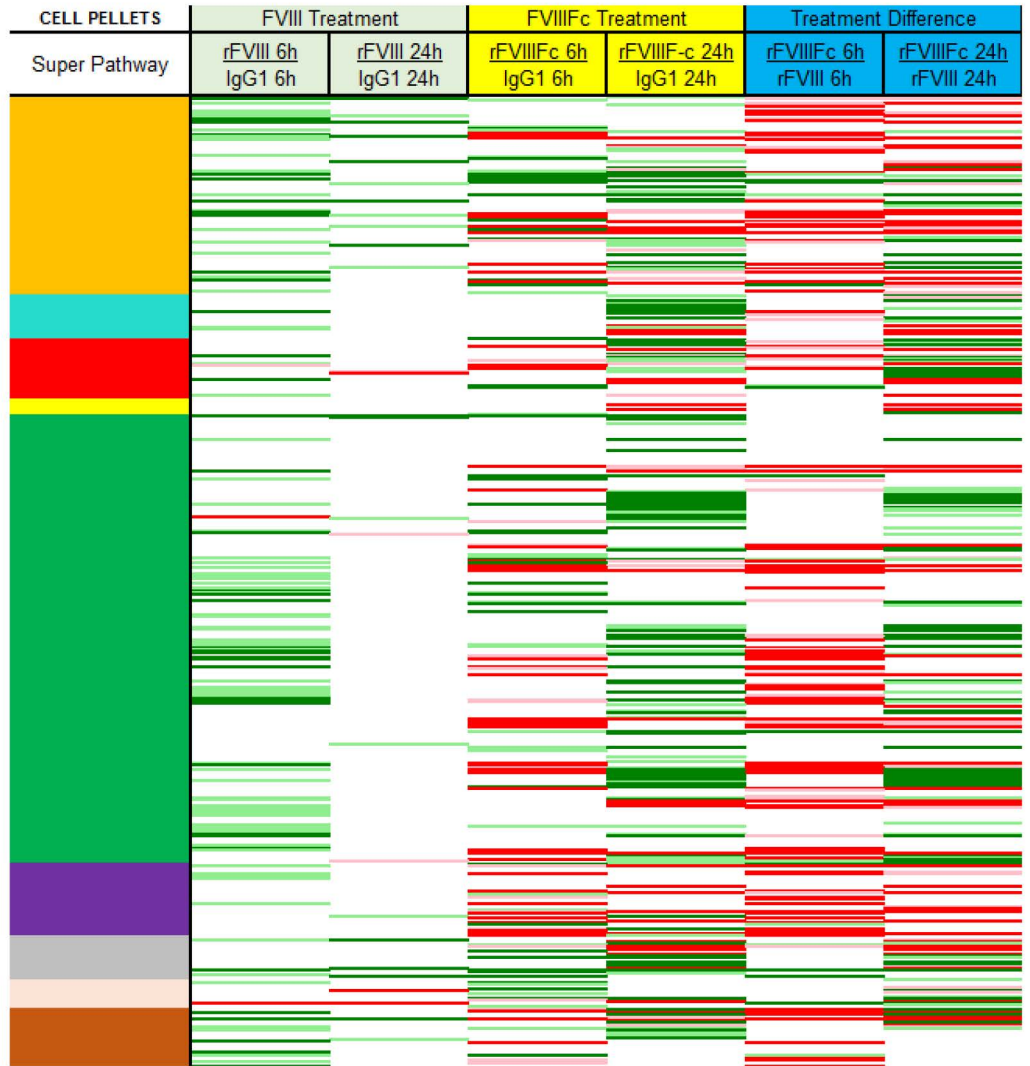

| Summary Counts                           | FVIII Treatment      |                        | FVIIIc Treatment      |                         | Treatment Differences   |                           |
|------------------------------------------|----------------------|------------------------|-----------------------|-------------------------|-------------------------|---------------------------|
|                                          | rFVIII 6H<br>IgG1 6H | rFVIII 24H<br>IgG1 24H | rFVIIIc 6H<br>IgG1 6H | rFVIIIc 24H<br>IgG1 24H | rFVIIIc 6H<br>rFVIII 6H | rFVIIIc 24H<br>rFVIII 24H |
| Total number of biochemicals with p≤0.05 | 43                   | 15                     | 88                    | 131                     | 107                     | 139                       |
| % of biochemicals with p≤0.05            | 7.0                  | 2.4                    | 14.3                  | 21.3                    | 17.4                    | 22.6                      |
| Biochemicals (↑↓)                        | 2   41               | 3   12                 | 49   39               | 37   94                 | 97   10                 | 65   74                   |
| Total number biochemicals 0.05<p<0.10    | 79                   | 12                     | 42                    | 62                      | 44                      | 57                        |
| % of biochemicals with 0.05<p<0.10       | 12.8                 | 2.0                    | 6.8                   | 10.1                    | 7.2                     | 9.3                       |
| Biochemicals (↑↓)                        | 1   78               | 3   9                  | 18   24               | 16   46                 | 36   8                  | 24   33                   |

| Cell Lysate<br>Biochemical Name    | FVIII Treatment      |                        | FVIII Fc Treatment      |                           |
|------------------------------------|----------------------|------------------------|-------------------------|---------------------------|
|                                    | rFVIII 6H<br>IgG1 6H | rFVIII 24H<br>IgG1 24H | rFVIII Fc 6H<br>IgG1 6H | rFVIII Fc 24H<br>IgG1 24H |
| butyrylcarnitine (C4)              | 0.84                 | 0.92                   | 1.03                    | 1.21                      |
| propionylcarnitine (C3)            | 0.72                 | 0.72                   | 0.46                    | 0.53                      |
| acetylcarnitine (C2)               | 0.83                 | 0.86                   | 0.72                    | 0.84                      |
| 3-hydroxybutyrylcarnitine (1)      | 0.88                 | 1.08                   | 1.21                    | 1.17                      |
| 3-hydroxybutyrylcarnitine (2)      | 0.91                 | 0.84                   | 0.99                    | 1.35                      |
| hexanoylcarnitine (C6)             | 0.93                 | 1.15                   | 1.81                    | 1.04                      |
| octanoylcarnitine (C8)             | 0.84                 | 1.12                   | 1.67                    | 0.86                      |
| decanoylcarnitine (C10)            | 0.73                 | 1.49                   | 1.14                    | 1                         |
| 5-dodecenoylcarnitine (C12:1)      | 1.19                 | 1.14                   | 1.56                    | 0.6                       |
| laurylcarnitine (C12)              | 1.13                 | 1.11                   | 2.58                    | 0.76                      |
| myristoylcarnitine (C14)           | 1.01                 | 1.08                   | 1.73                    | 0.66                      |
| palmitoylcarnitine (C16)           | 1.01                 | 0.87                   | 1.52                    | 0.51                      |
| palmitoleoylcarnitine (C16:1)*     | 1.28                 | 1                      | 1.3                     | 0.38                      |
| stearoylcarnitine (C18)            | 0.91                 | 0.88                   | 1.32                    | 0.55                      |
| linoleoylcarnitine (C18:2)*        | 1.18                 | 0.77                   | 0.8                     | 0.21                      |
| 3-hydroxyoleoylcarnitine           | 1.03                 | 0.98                   | 1.16                    | 0.57                      |
| oleoylcarnitine (C18:1)            | 1.41                 | 1.01                   | 1.25                    | 0.34                      |
| myristoleoylcarnitine (C14:1)*     | 1.23                 | 1.16                   | 1.3                     | 0.4                       |
| adipoylcarnitine (C6-DC)           | 0.72                 | 0.83                   | 0.64                    | 0.99                      |
| arachidoylcarnitine (C20)*         | 0.85                 | 0.79                   | 0.95                    | 0.59                      |
| arachidonoylcarnitine (C20:4)      | 1.28                 | 0.84                   | 0.81                    | 0.23                      |
| adrenoylcarnitine (C22:4)*         | 1.08                 | 0.72                   | 0.59                    | 0.31                      |
| behenoylcarnitine (C22)*           | 0.82                 | 0.97                   | 0.9                     | 0.71                      |
| dihomo-linoleoylcarnitine (C20:2)* | 1.11                 | 0.84                   | 1.1                     | 0.52                      |
| eicosenoylcarnitine (C20:1)*       | 0.85                 | 0.86                   | 0.87                    | 0.64                      |
| erucoylcarnitine (C22:1)*          | 0.8                  | 0.82                   | 0.82                    | 0.48                      |
| docosatrienoylcarnitine (C22:3)*   | 1.55                 | 0.78                   | 1.16                    | 1.26                      |
| tetracosadienoylcarnitine (C24:2)* | 0.84                 | 0.71                   | 0.77                    | 0.57                      |
| lignoceroylcarnitine (C24)*        | 0.78                 | 0.87                   | 0.91                    | 0.86                      |
| margaroylcarnitine (C17)*          | 1.13                 | 0.9                    | 1.71                    | 0.64                      |
| pentadecanoylcarnitine (C15)*      | 1.18                 | 0.92                   | 1.81                    | 0.54                      |
| 3-hydroxypalmitoylcarnitine        | 0.93                 | 1                      | 1.37                    | 0.71                      |
| N6,N6,N6-trimethyllysine           | 0.81                 | 0.77                   | 1.19                    | 0.72                      |
| deoxycarnitine                     | 0.8                  | 0.87                   | 0.77                    | 1.06                      |
| carnitine                          | 0.78                 | 0.94                   | 0.77                    | 1.12                      |
| 3-hydroxybutyrate (BHBA)           | 0.96                 | 1.43                   | 1.18                    | 0.99                      |

**A**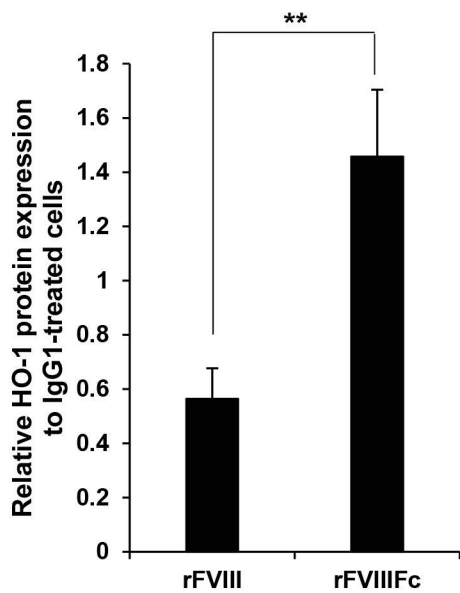**B**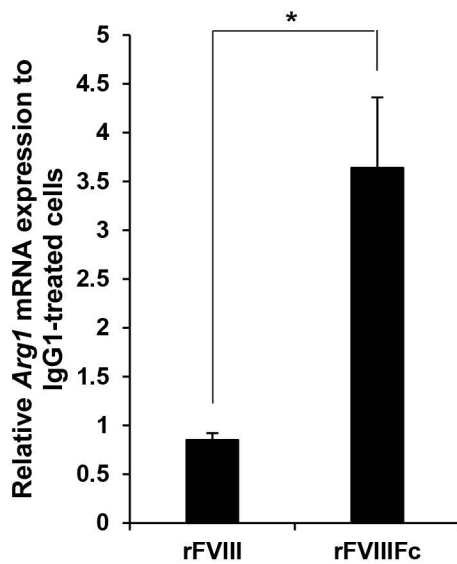**C**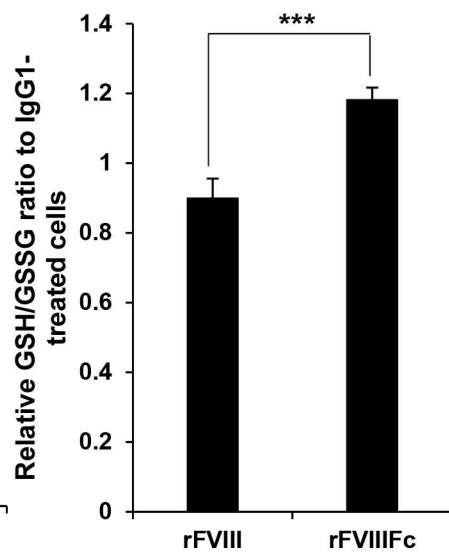

Supplement: ba024497-suppl1.pdf [file ba024497-suppl1.pdf]
